# Supplementary material for: Co-transport of H+/Cl– by a synthetic prodigiosin mimic
Source: Royal Society of Chemistry journal article supplement (doi:10.1039/b503906a), 2005-01-01
Supplement: b503906a.pdf [file b503906a.pdf]

## Cotransport of H<sup>+</sup>/Cl<sup>-</sup> by a synthetic prodigiosin mimic

Philip A. Gale,<sup>\*a</sup> Mark E. Light,<sup>a</sup> Beth McNally,<sup>b</sup> Korakot Navakhun,<sup>a</sup> Kate E. Sliwinski,<sup>a</sup>  
and Bradley D. Smith<sup>\*b</sup>

<sup>a</sup> School of Chemistry, University of Southampton, Southampton, SO17 1BJ, UK. Fax: 44 2380596805; Tel: 44 23 80593332; E-mail: philip.gale@soton.ac.uk

<sup>b</sup> Department of Chemistry and Biochemistry, University of Notre Dame, IN 46556, USA. Fax: 1 574 631 6652; Tel: 1 574 631 8632; E-mail: smith.115@nd.edu

### Electronic Supplementary Information

#### Synthesis and Characterisation

##### Compound 2 5-Methyl-3,4-diphenyl-1H-pyrrole-2-carboxylic acid (1-methyl-1H-imidazol-2-ylmethyl)-amide

1-Methyl-2-aminomethylimidazole (260 mg, 2.4 mmol) was stirred with 2.0 M trimethylaluminium solution in hexane (3 ml, 6 mmol) in dichloromethane (40 ml) for 30 min. 5-Methyl-3,4-diphenyl-1*H*-pyrrole-2-carboxylic acid ethyl ester (365 mg, 1.2 mmol) was added to the solution and the reaction heated at reflux for 7 days. The reaction was quenched by the dropwise addition of dilute HCl solution and the reaction mixture extracted with dichloromethane solution (2 x 50 ml). The organic phase was reduced in *vacuo* and the residue purified by column chromatography eluting with dichloromethane/methanol (10:1 *v/v*) on silica gel affording compound **2** as a white solid (123 mg, 0.33 mmol, 27%).

<sup>1</sup>H NMR 300 MHz in CDCl<sub>3</sub> δ (ppm): 2.36 (s, 3H, CH<sub>3</sub>pyrrole), 3.61 (s, 3H, CH<sub>3</sub>imidazole), 4.50 (d, 2H, *J* = 5.4, CH<sub>2</sub>), 6.04 (t, 1H, *J* = 5.4, CONH) 6.79 (s, 1H, imidazole*H*), 6.85 (s, 1H, imidazole*H*), 6.99-7.28 (m, 10H, Ar*H*), 9.33 (s, br, 1H, NH-Pyrrole). <sup>13</sup>C NMR 75 MHz in CDCl<sub>3</sub> δ (ppm): 1.1, 12.3, 35.5, 121.5, 125.9, 127.6, 127.8, 128.0, 138.5, 129.0, 130.1, 130.5, 134.4, 134.6, 161.0. ES<sup>+</sup> HRMS: *m/z*: Calc. for C<sub>23</sub>H<sub>22</sub>N<sub>4</sub>O [M]<sup>+</sup>: 371.1866; found 371.1869.

##### Compound 3 5-Methyl-3,4-diphenyl-1H-pyrrole-2-carboxylic acid pyridin-2-ylamide

2-Aminopyridine (3.08 g, 32.7 mmol) was stirred with 2.0 M trimethylaluminium solution in hexane (12 ml, 24 mmol) in dichloromethane (50 ml) for 30 min. 5-Methyl-

# Supplementary Material (ESI) for Chemical Communications  
# This journal is © The Royal Society of Chemistry 2005

3,4-diphenyl-*1H*-pyrrole-2-carboxylic acid ethyl ester (1 g, 3.3 mmol) was added to the solution and the mixture was heated at reflux for 5 days. The reaction was quenched by the dropwise addition of dilute HCl solution and the reaction mixture extracted with dichloromethane solution (2 x 50 ml). The organic solution was reduced in *vacuo* and the residue was purified by column chromatography on silica gel eluting with dichloromethane/methanol (100:2 *v/v*). The solvent was removed and the residue was recrystallized from acetonitrile to yield compound **3** as a white solid (157 mg, 0.44 mmol, 13%).

<sup>1</sup>H NMR 300 MHz in CDCl<sub>3</sub> δ (ppm): 2.40 (s, 3H, CH<sub>3</sub>), 6.70-8.11 (m, 16H, ArH and PyrH), 7.98 (s, 1H, CONHAr), 9.42 (s, br, 1H, NH-Pyrrole). <sup>13</sup>C NMR 75 MHz in DMSO-*d*<sub>6</sub> δ (ppm): 12.5, 114.2, 119.3, 126.1, 128.1, 128.3, 129.3, 130.2, 130.9, 134.1, 134.5, 137.9, 148.3, 151.7, 154.4. ES<sup>+</sup> mass spectrum: *m/z* (%): 354 (100) [M+H]<sup>+</sup>, 707 (10) [2M+H]<sup>+</sup>. ES<sup>+</sup> HRMS: *m/z*: Calc. for C<sub>23</sub>H<sub>20</sub>N<sub>3</sub>O [M+H]<sup>+</sup>: 354.1601; found: 354.1599.

# Supplementary Material (ESI) for Chemical Communications  
# This journal is © The Royal Society of Chemistry 2005

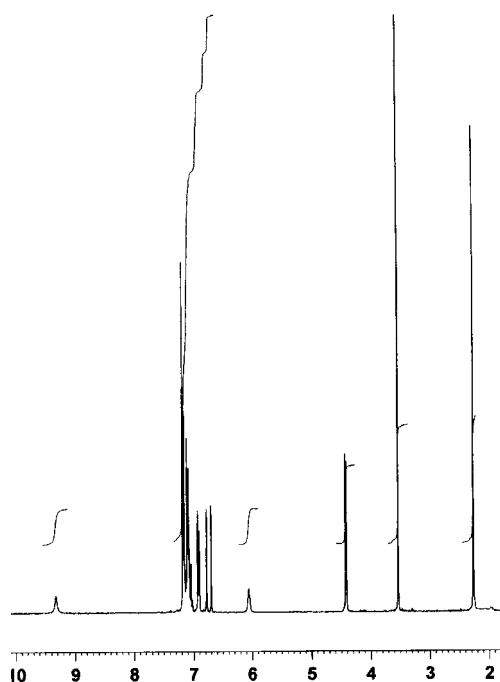

Figure S1  $^1\text{H}$  NMR of compound **2** in  $\text{CDCl}_3$

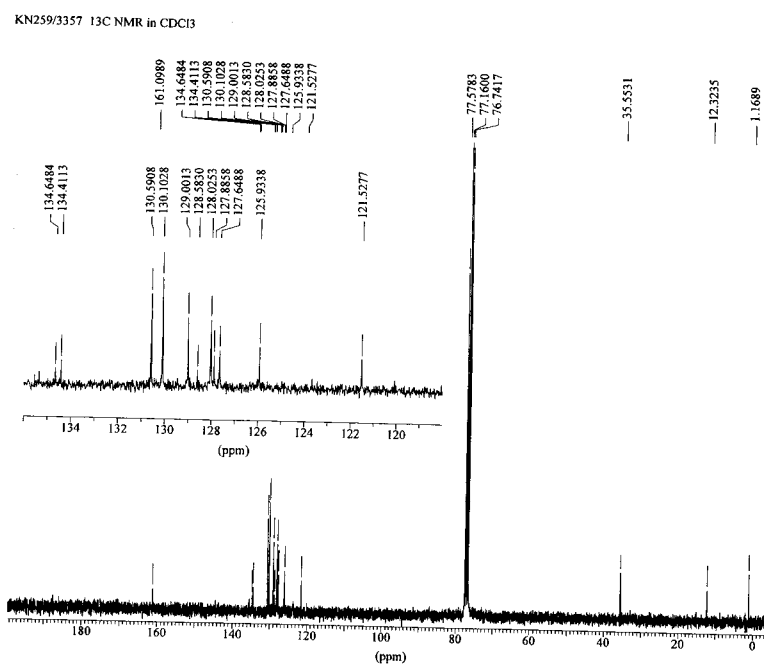

Figure S2  $^{13}\text{C}$  NMR of compound **2** in  $\text{CDCl}_3$

# Supplementary Material (ESI) for Chemical Communications  
# This journal is © The Royal Society of Chemistry 2005

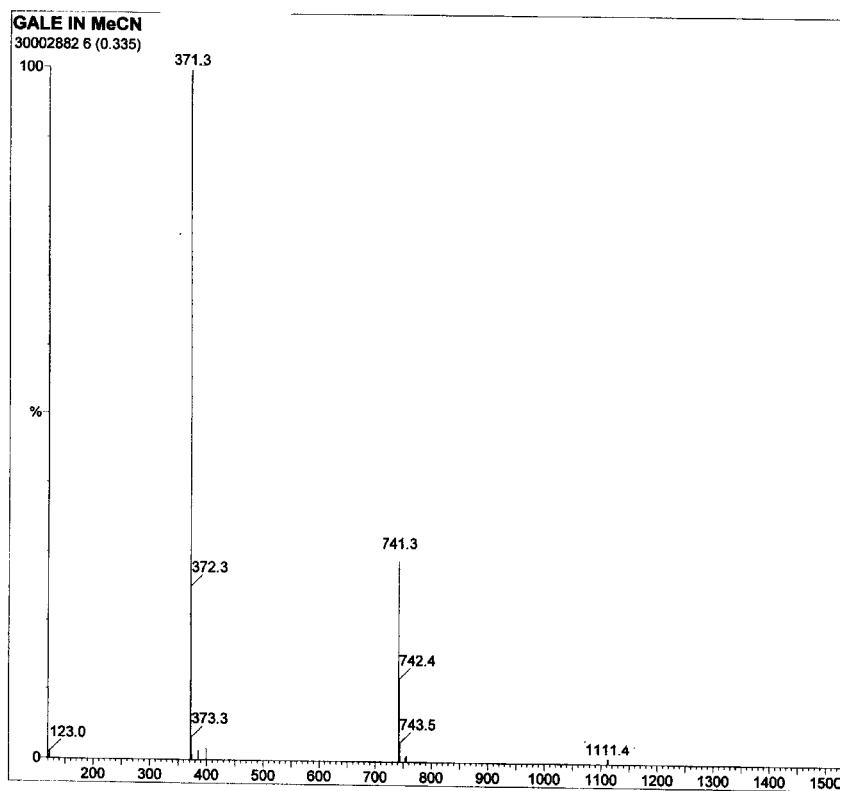

Figure S3 Positive ES MS of Compound 2.

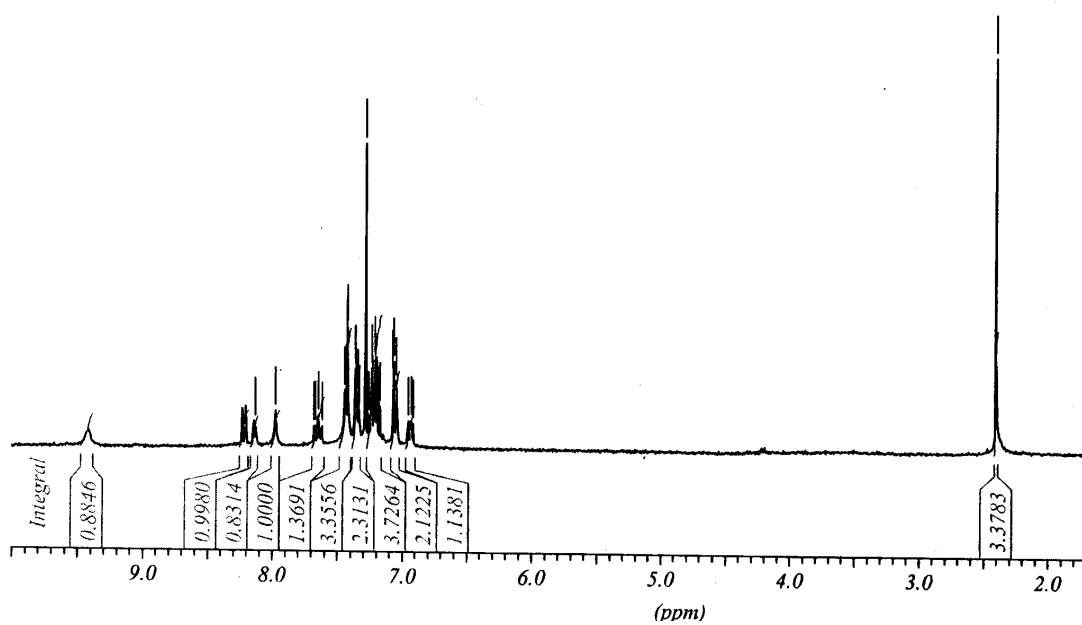

Figure S4  $^1\text{H}$  NMR of Compound 3 in  $\text{CDCl}_3$

# Supplementary Material (ESI) for Chemical Communications  
# This journal is © The Royal Society of Chemistry 2005

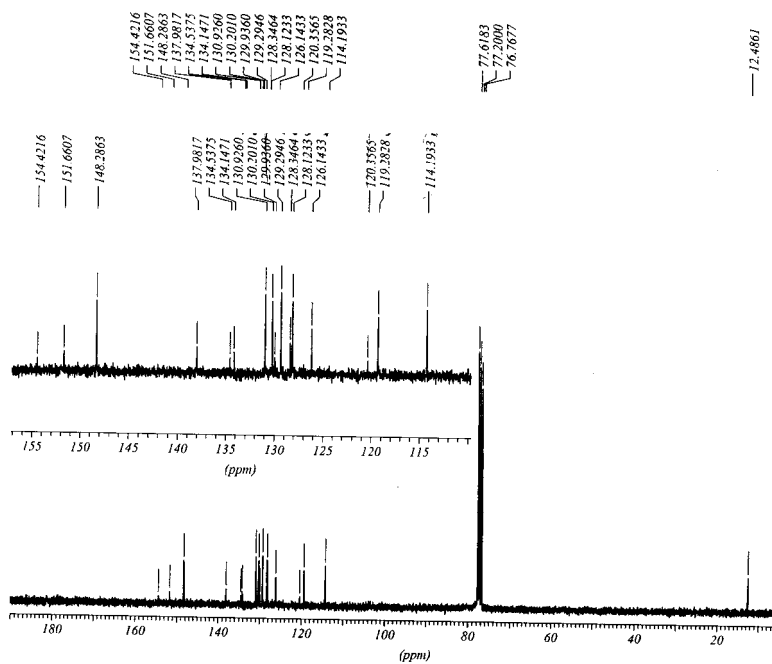

Figure S5  $^{13}\text{C}$  NMR of Compound 3 in  $\text{CDCl}_3$

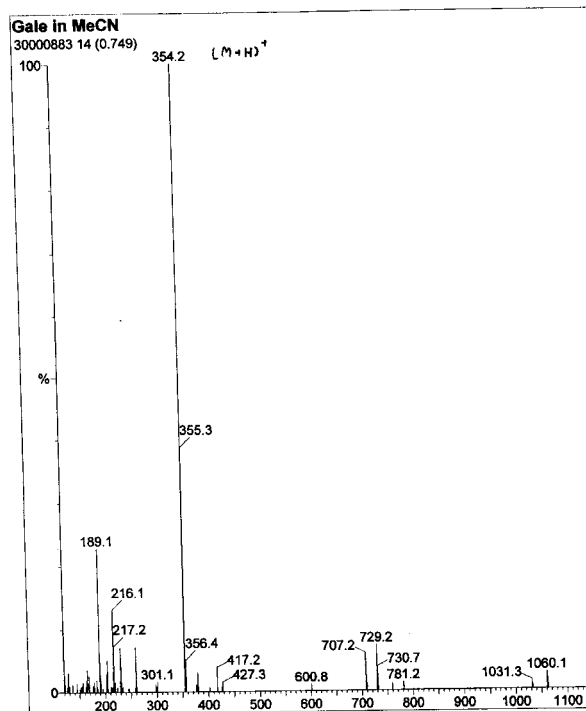

Figure S6 Positive ES MS of Compound 3

# Supplementary Material (ESI) for Chemical Communications  
# This journal is © The Royal Society of Chemistry 2005

#### *Preparation of Unilamellar Vesicles*

A chloroform solution of 1-palmitoyl-2-oleoyl-sn-glycero-3-phosphocholine (Avanti Polar Lipids) and cholesterol were combined in a 10 mL round bottom flask. The chloroform was removed using a rotary evaporator and the lipid film was dried under a high vacuum system for over an hour. Upon addition of 1.0 mL solution (500 mM NaCl and 5 mM citric acid, pH 4.0 or 7.2) and a Pyrex glass bead, the solution was vortexed to rehydrate the lipid film. The lipid solution was subject to nine freeze-thaw cycles and twenty-nine extrusions through a 200 nm polycarbonate Nucleopore membrane using a LiposoFast Basic extruder (Avestin, inc.) to obtain unilamellar vesicles. The vesicles were dialyzed for 10 hours to remove unencapsulated salts and/or fluorophores. Dialysis used an outside solution of 500 mM NaNO<sub>3</sub> and 5 mM citric acid at the same pH.

#### *Chloride Transport Assay*

Unilamellar vesicles (200 nm mean diameter) composed of POPC/cholesterol (7:3 molar ratio), and containing an inside solution of 500 mM NaCl and 5 mM citric acid, pH 4.0 or 7.2, and an outside solution of 500 mM NaNO<sub>3</sub> and 5 mM citric acid, at the same pH, were added to a solution of 500 mM NaNO<sub>3</sub> and 5 mM citric acid, pH 4.0 or 5 mM sodium phosphate, pH 7.2 for a final lipid concentration of 1 mM. When the chloride release from vesicles upon addition of a compound (10 μM) was monitored using an Accumet chloride selective electrode for 20 minutes. The vesicles were lysed with detergent (polyoxyethylene (8) lauryl ether) to release all chloride ions.

# Supplementary Material (ESI) for Chemical Communications  
# This journal is © The Royal Society of Chemistry 2005

### *Chloride Transport Assay*

Three different conditions were generated using unilamellar vesicles (200 nm mean diameter) composed of POPC/cholesterol (7:3 molar ratio). (a) inside vesicles, pH 4.0, outside vesicles, pH 4.0. Vesicles with inside solution of 500 mM NaCl and 5 mM citric acid, pH 4.0, and an outside solution of 500 mM NaNO<sub>3</sub> and 5 mM citric acid, pH 4.0, were diluted in a solution of 500 mM NaNO<sub>3</sub> and 5 mM citric acid, pH 4.0 for a final lipid concentration of 1 mM. (b) inside vesicles, pH 4.0, outside vesicles, pH 6.7. Vesicles with inside solution of 500 mM NaCl and 5 mM citric acid, pH 4.0, and an outside solution of 500 mM NaNO<sub>3</sub> and 5 mM citric acid, pH 4.0, were diluted in a solution of 500 mM NaNO<sub>3</sub> and 5 mM sodium phosphate, pH 7.2 for a final lipid concentration of 1 mM, and a final external pH of 6.7. (c) inside vesicles, pH 7.2, outside vesicles, pH 7.2. Vesicles with inside solution of 500 mM NaCl and 5 mM citric acid, pH 7.2, and an outside solution of 500 mM NaNO<sub>3</sub> and 5 mM citric acid, pH 7.2, were diluted in a solution of 500 mM NaNO<sub>3</sub> and 5 mM citric acid, pH 7.2 for a final lipid concentration of 1 mM.

### *pH Detection Assay*

Oregon Green<sup>®</sup> 514 (10 μM), a pH sensitive fluorophore (purchased from Molecular Probes Inc) was encapsulated inside 200 nm mean diameter POPC/cholesterol (7:3 molar ratio) vesicles along with 500 mM NaCl and 5 mM citric acid, pH 4.0. Vesicles were dispersed in 500 mM NaNO<sub>3</sub> and 5 mM sodium phosphate, pH 7.2 for a final lipid concentration of 550 μM. The fluorescence of Oregon Green<sup>®</sup> 514 was monitored using 555 nm emission upon excitation at 510 nm with a Perkin Elmer luminescence

# Supplementary Material (ESI) for Chemical Communications

# This journal is © The Royal Society of Chemistry 2005

spectrometer. The fluorescence baseline was monitored for 200 seconds, upon which compounds **2** and **3** (8.8  $\mu\text{M}$ ) were added to the vesicle solution. The vesicles were lysed at 1000 seconds with detergent (polyoxyethylene (8) lauryl ether) to dissipate the gradient.
